# Supplementary material
Source: publisher figshare collection journal article supplement (https://sage.figshare.com/ndownloader/files/20066309)
Supplement: Supplementary file 1 [file 20066309]

**Supplementary Table S1. Adverse events during the 6 months after kidney biopsy**

|                                      | No<br>induction<br>N = 10 | Induction<br>N = 80 |                 |                  | p     |
|--------------------------------------|---------------------------|---------------------|-----------------|------------------|-------|
|                                      |                           | CYC<br>(N = 66)     | MMF<br>(N = 10) | Other<br>(N = 4) |       |
| Serious infection <sup>a</sup>       | 2                         | 10                  | 0               | 0                | 0.617 |
| Lymphopenia (new onset) <sup>b</sup> | 1                         | 18                  | 3               | 0                | 0.240 |
| Neutropenia <sup>c</sup>             | 0                         | 4                   | 0               | 0                | 0.453 |

<sup>a</sup>Severe infections were defined as those requiring intravenous antibiotic or antiviral therapy.

<sup>b</sup>Lymphopenia was defined as fewer than 800 lymphocytes per cubic millimeter. <sup>c</sup>Neutropenia was defined as fewer than 1000 neutrophils per cubic millimeter. CYC: cyclophosphamide; MMF: Mycophenolate mofetil

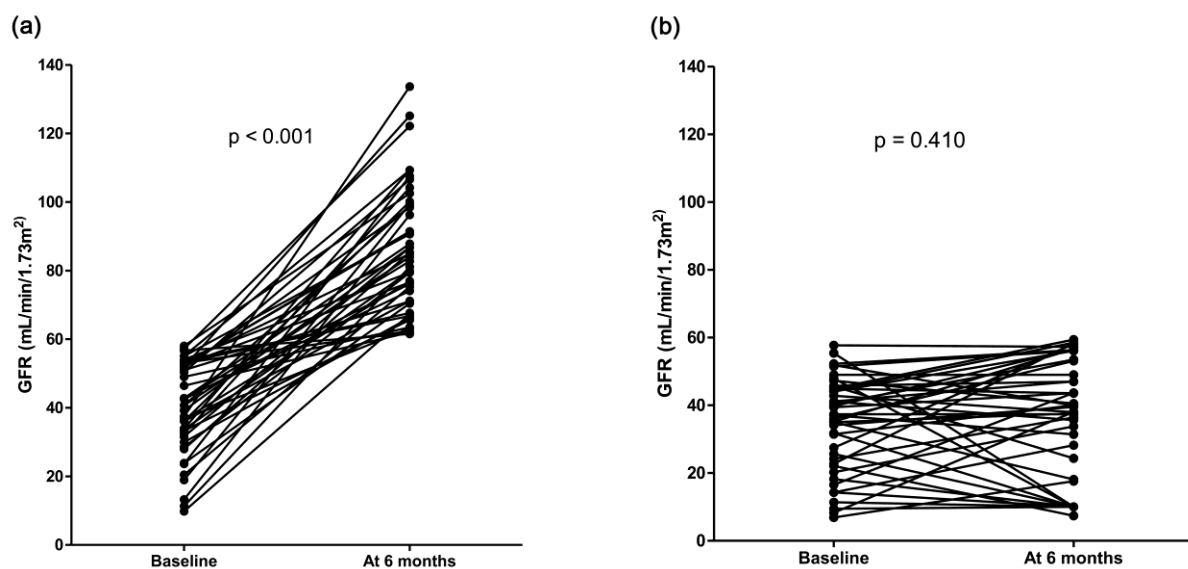

Supplementary Figure 1. Change of GFR values at 6 months compared with baseline. Patients with renal function recovery (a) and without recovery (b).
